# Supplementary material
Source: ML conference proceedings conference paper supplement (https://www.ecva.net/papers/eccv_2022/papers_ECCV/html/136820555_ECCV_2022_paper.php)

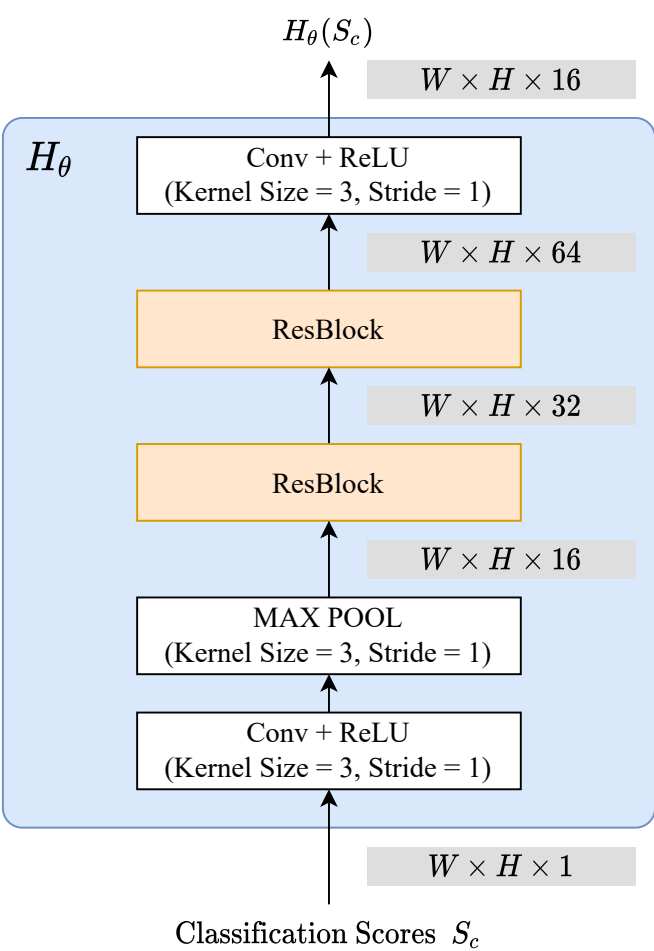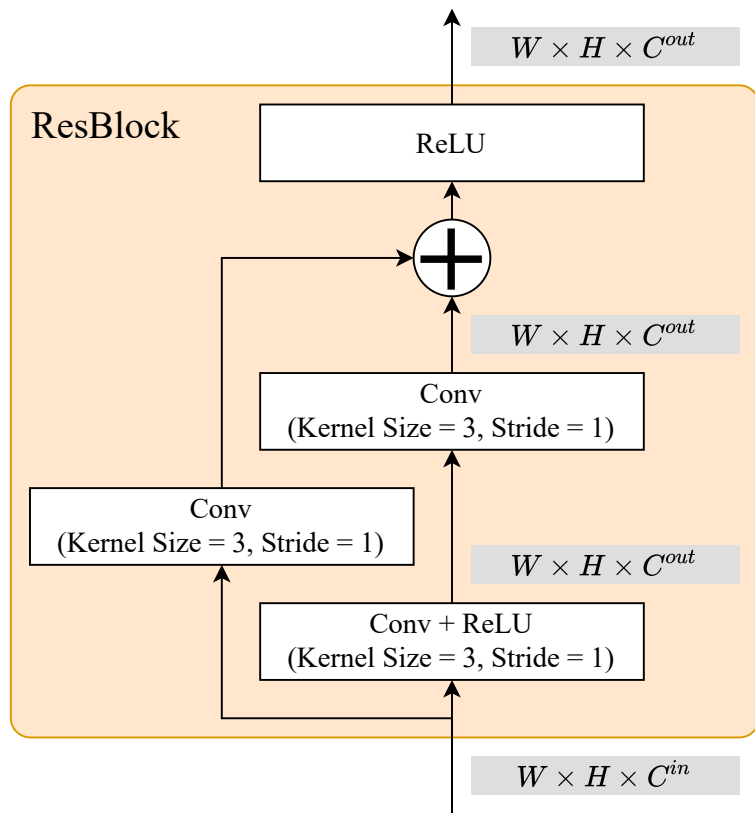

Supplement: Supplementary file 1 [file 136820555-supp.zip]

# Normalized Precision plot

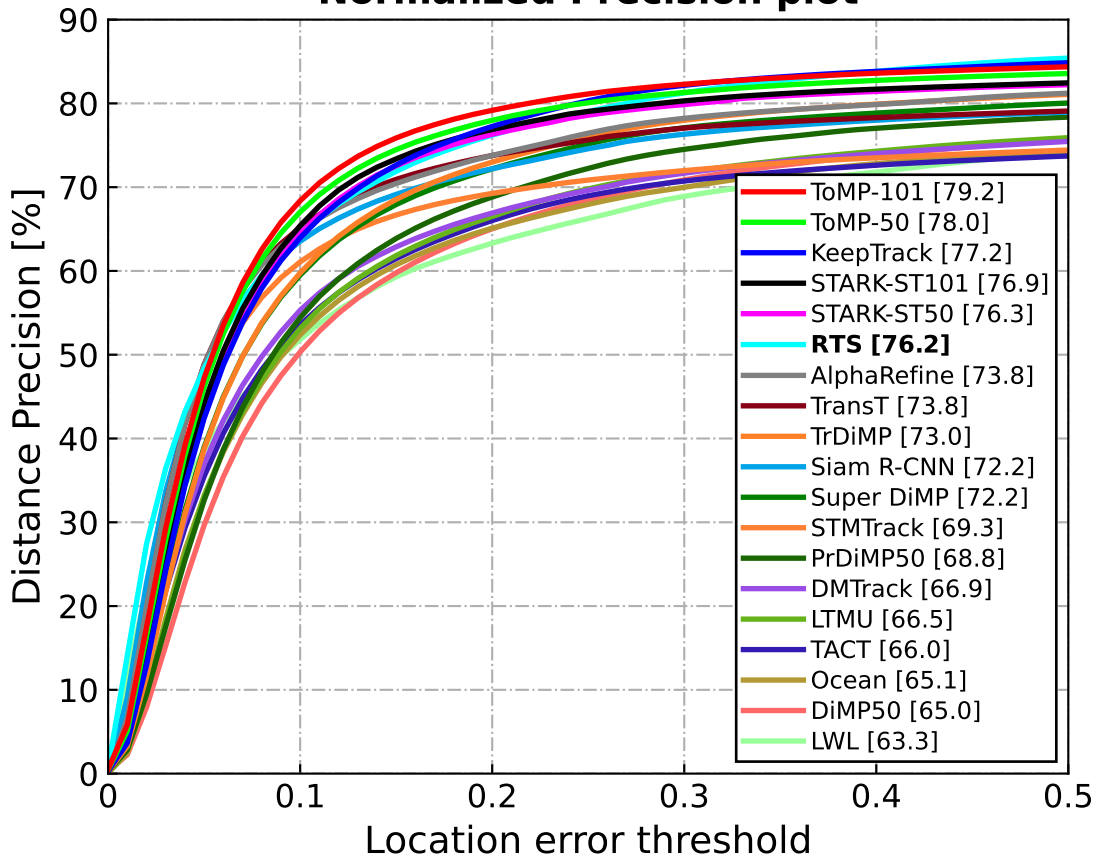

Supplement: Supplementary file 2 [file 136820555-supp.zip]

# Success plot

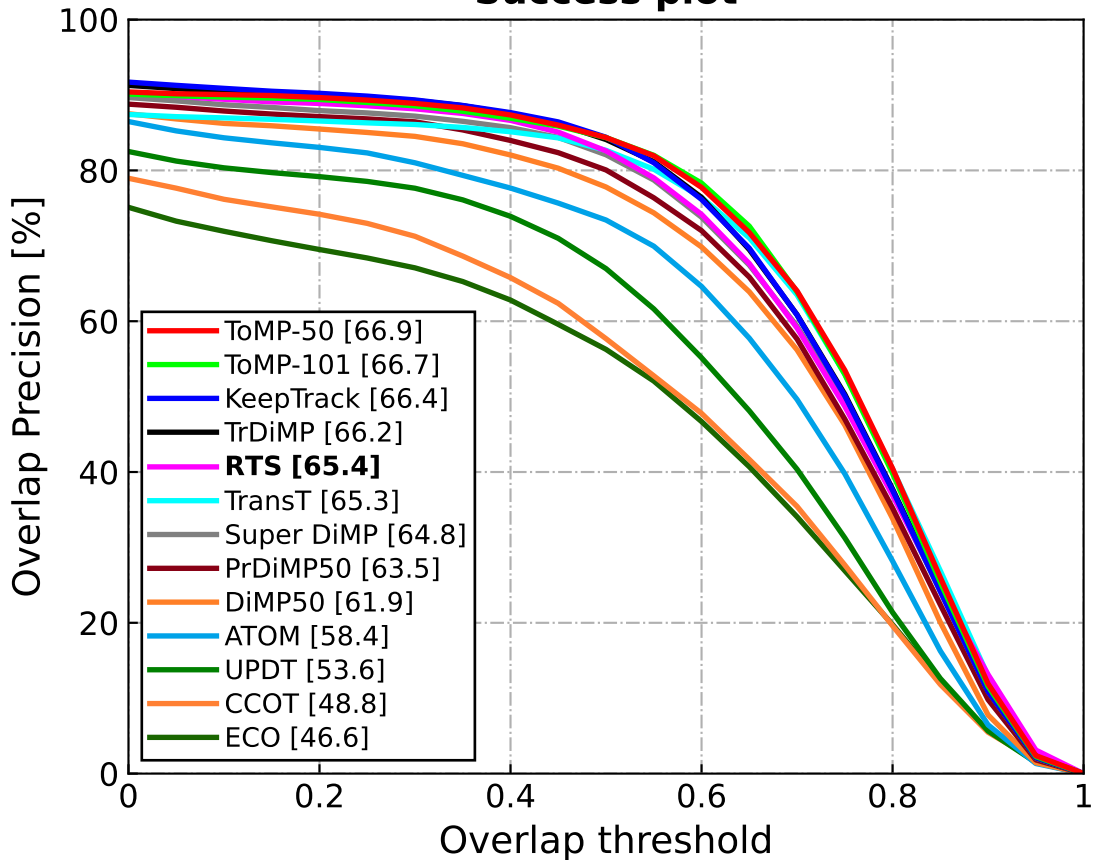

Supplement: Supplementary file 3 [file 136820555-supp.zip]

# Precision plot

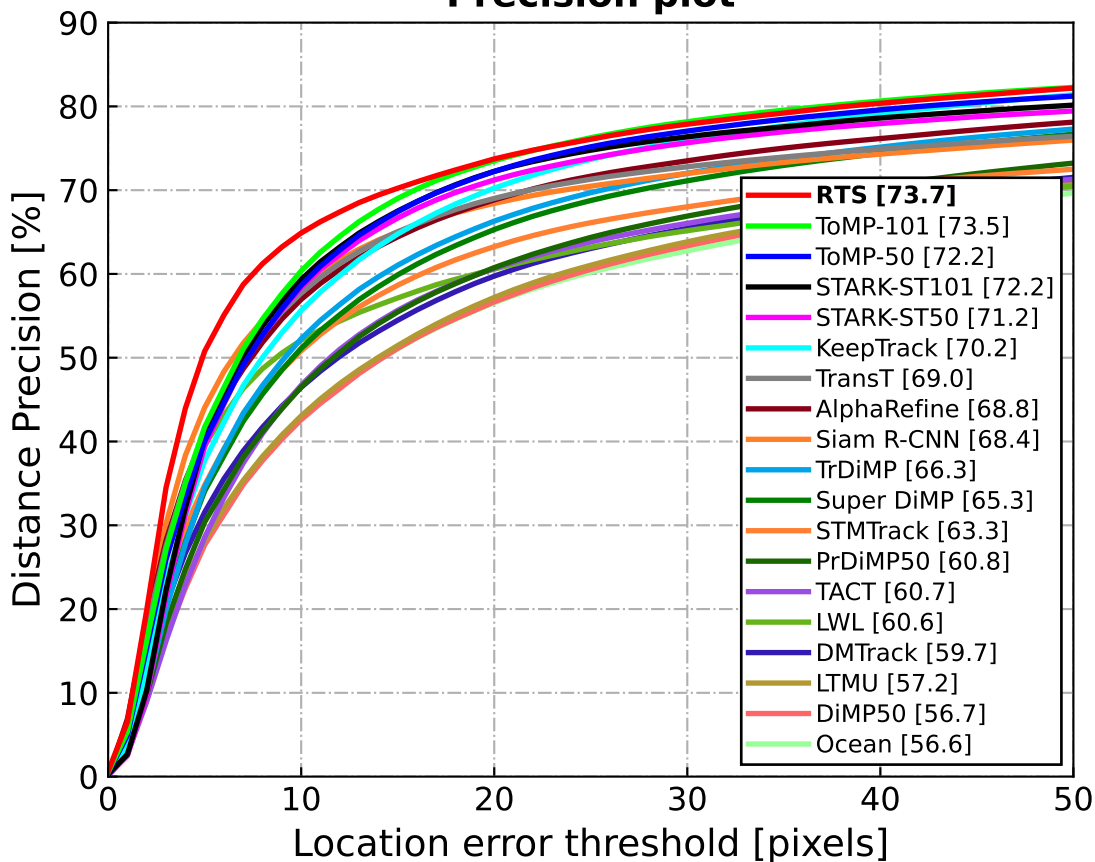

Supplement: Supplementary file 5 [file 136820555-supp.zip]

# Success plot

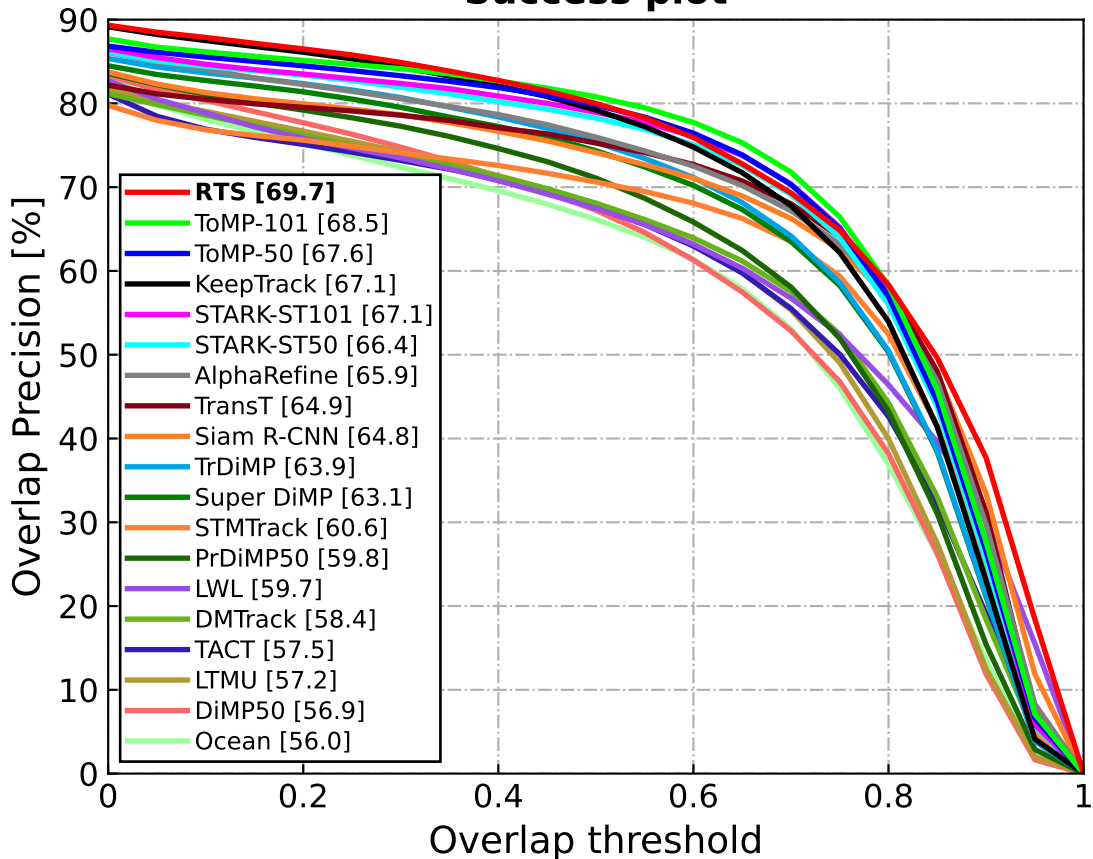

Supplement: Supplementary file 6 [file 136820555-supp.zip]

# Success plot

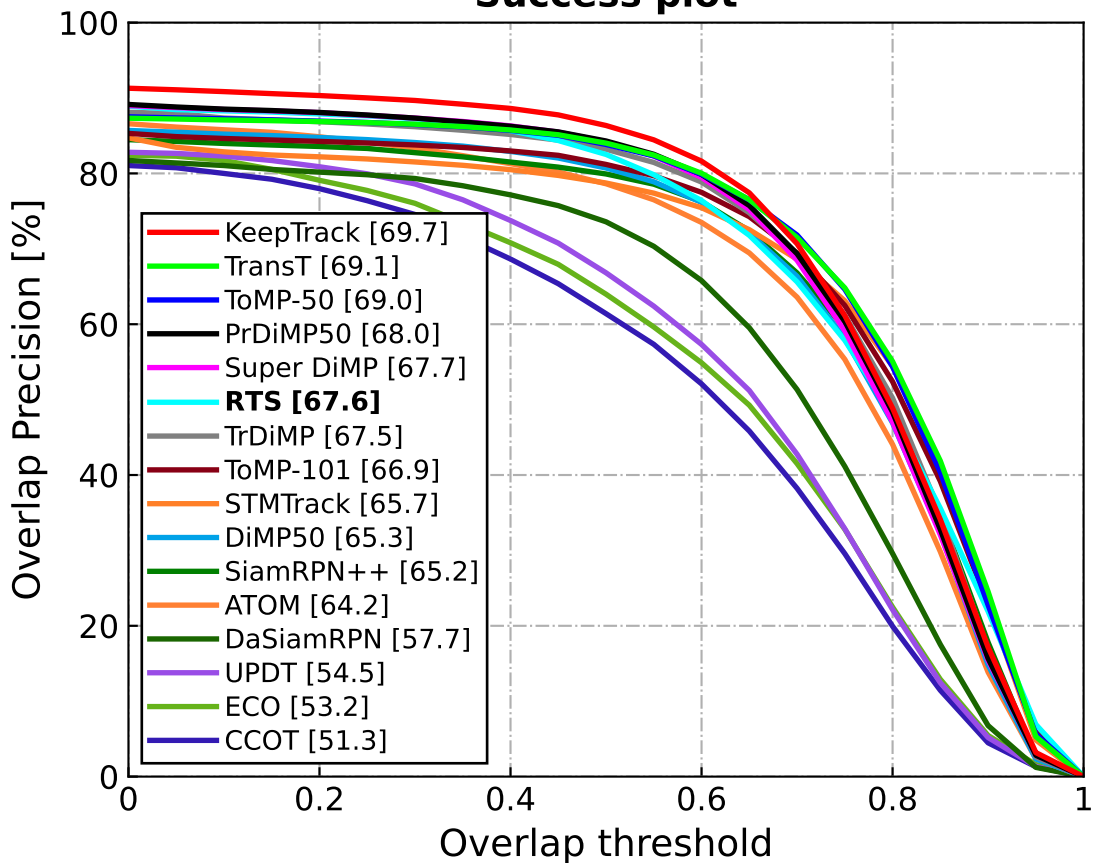

Supplement: Supplementary file 7 [file 136820555-supp.zip]

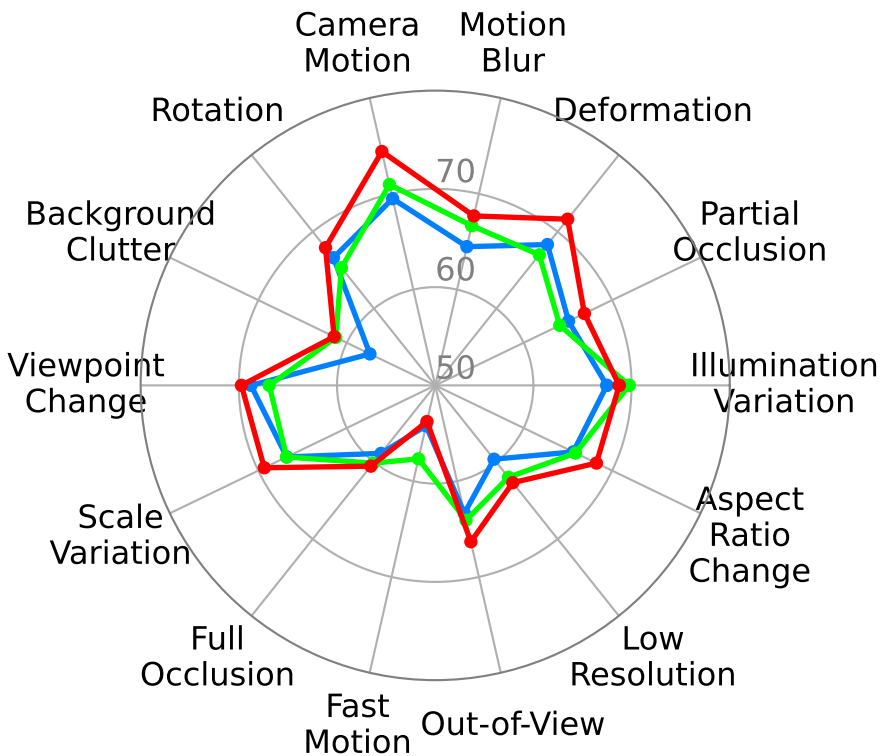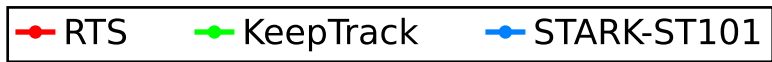

Supplement: Supplementary file 8 [file 136820555-supp.zip]

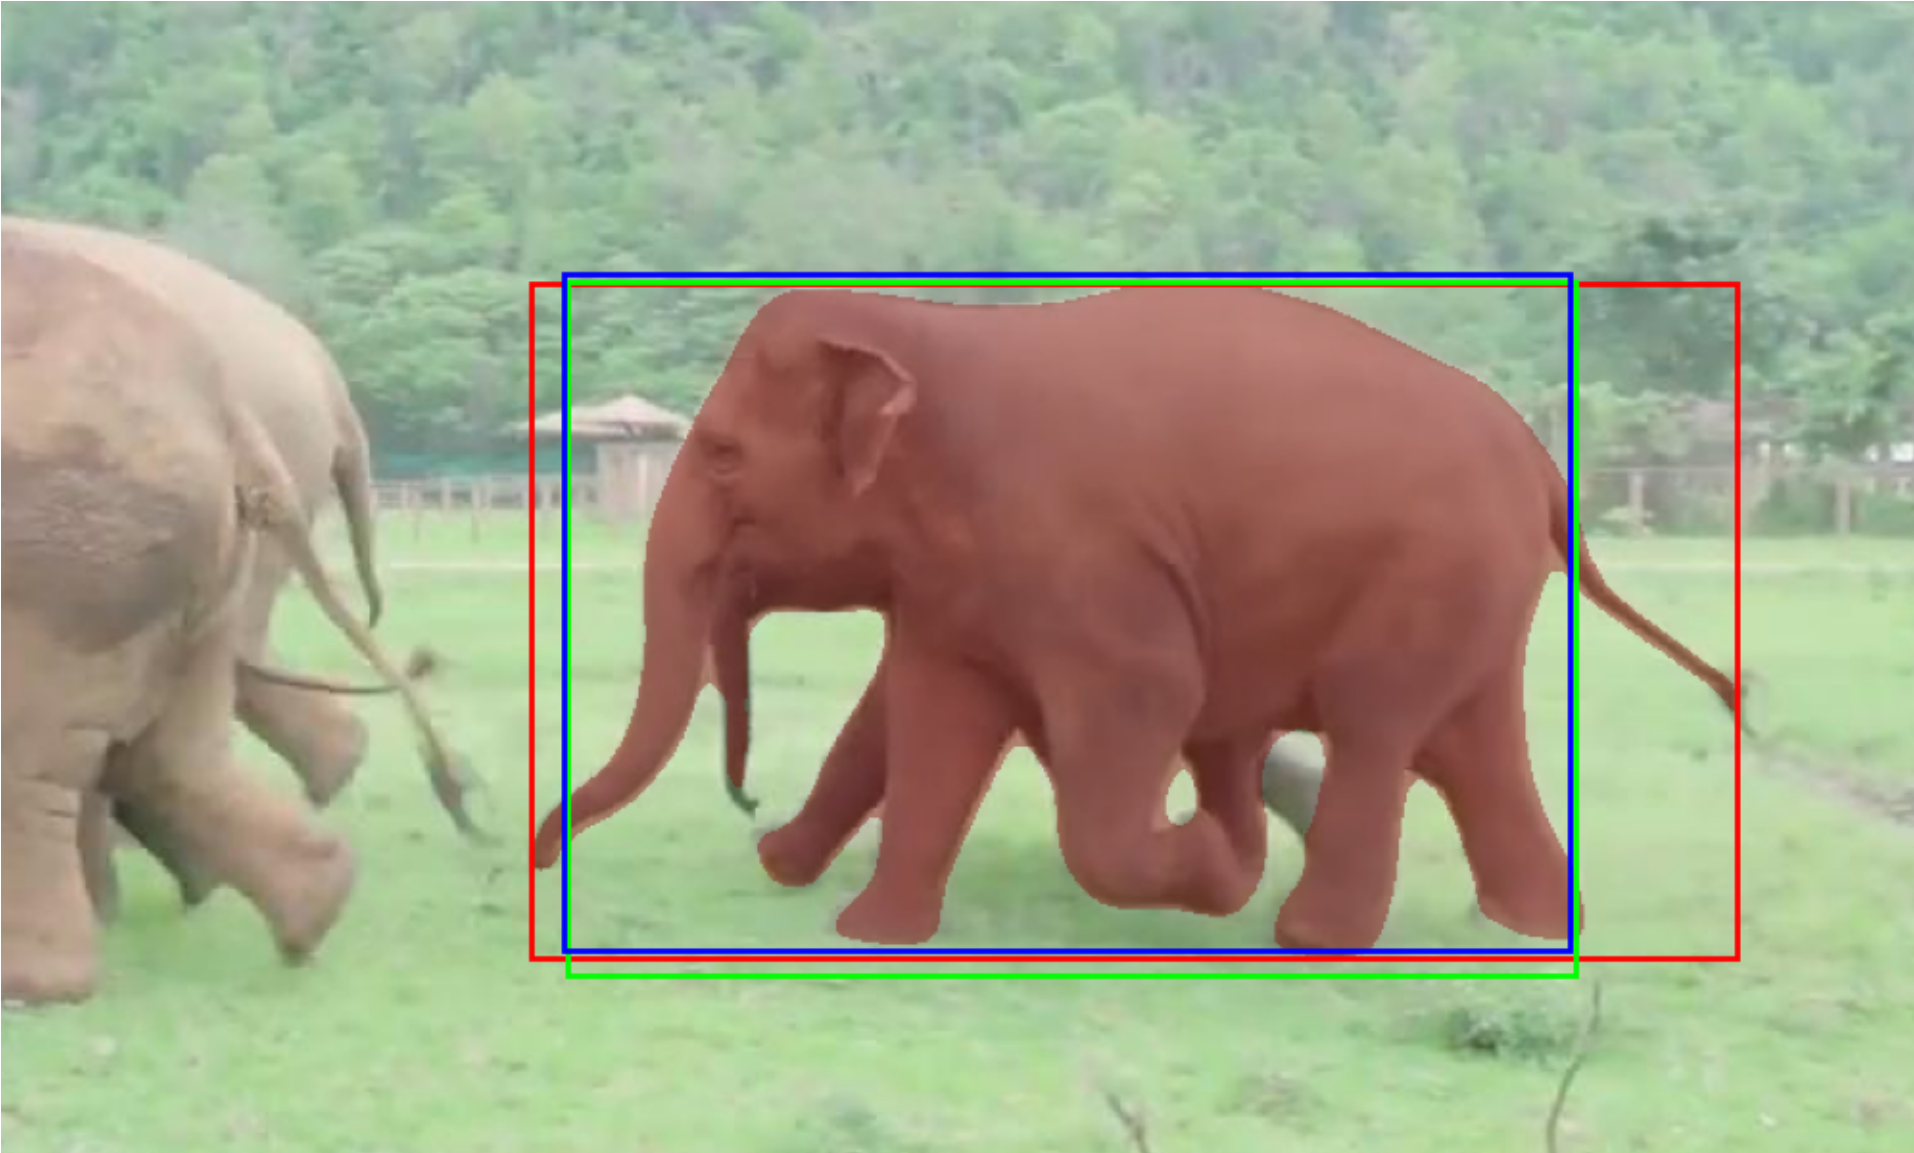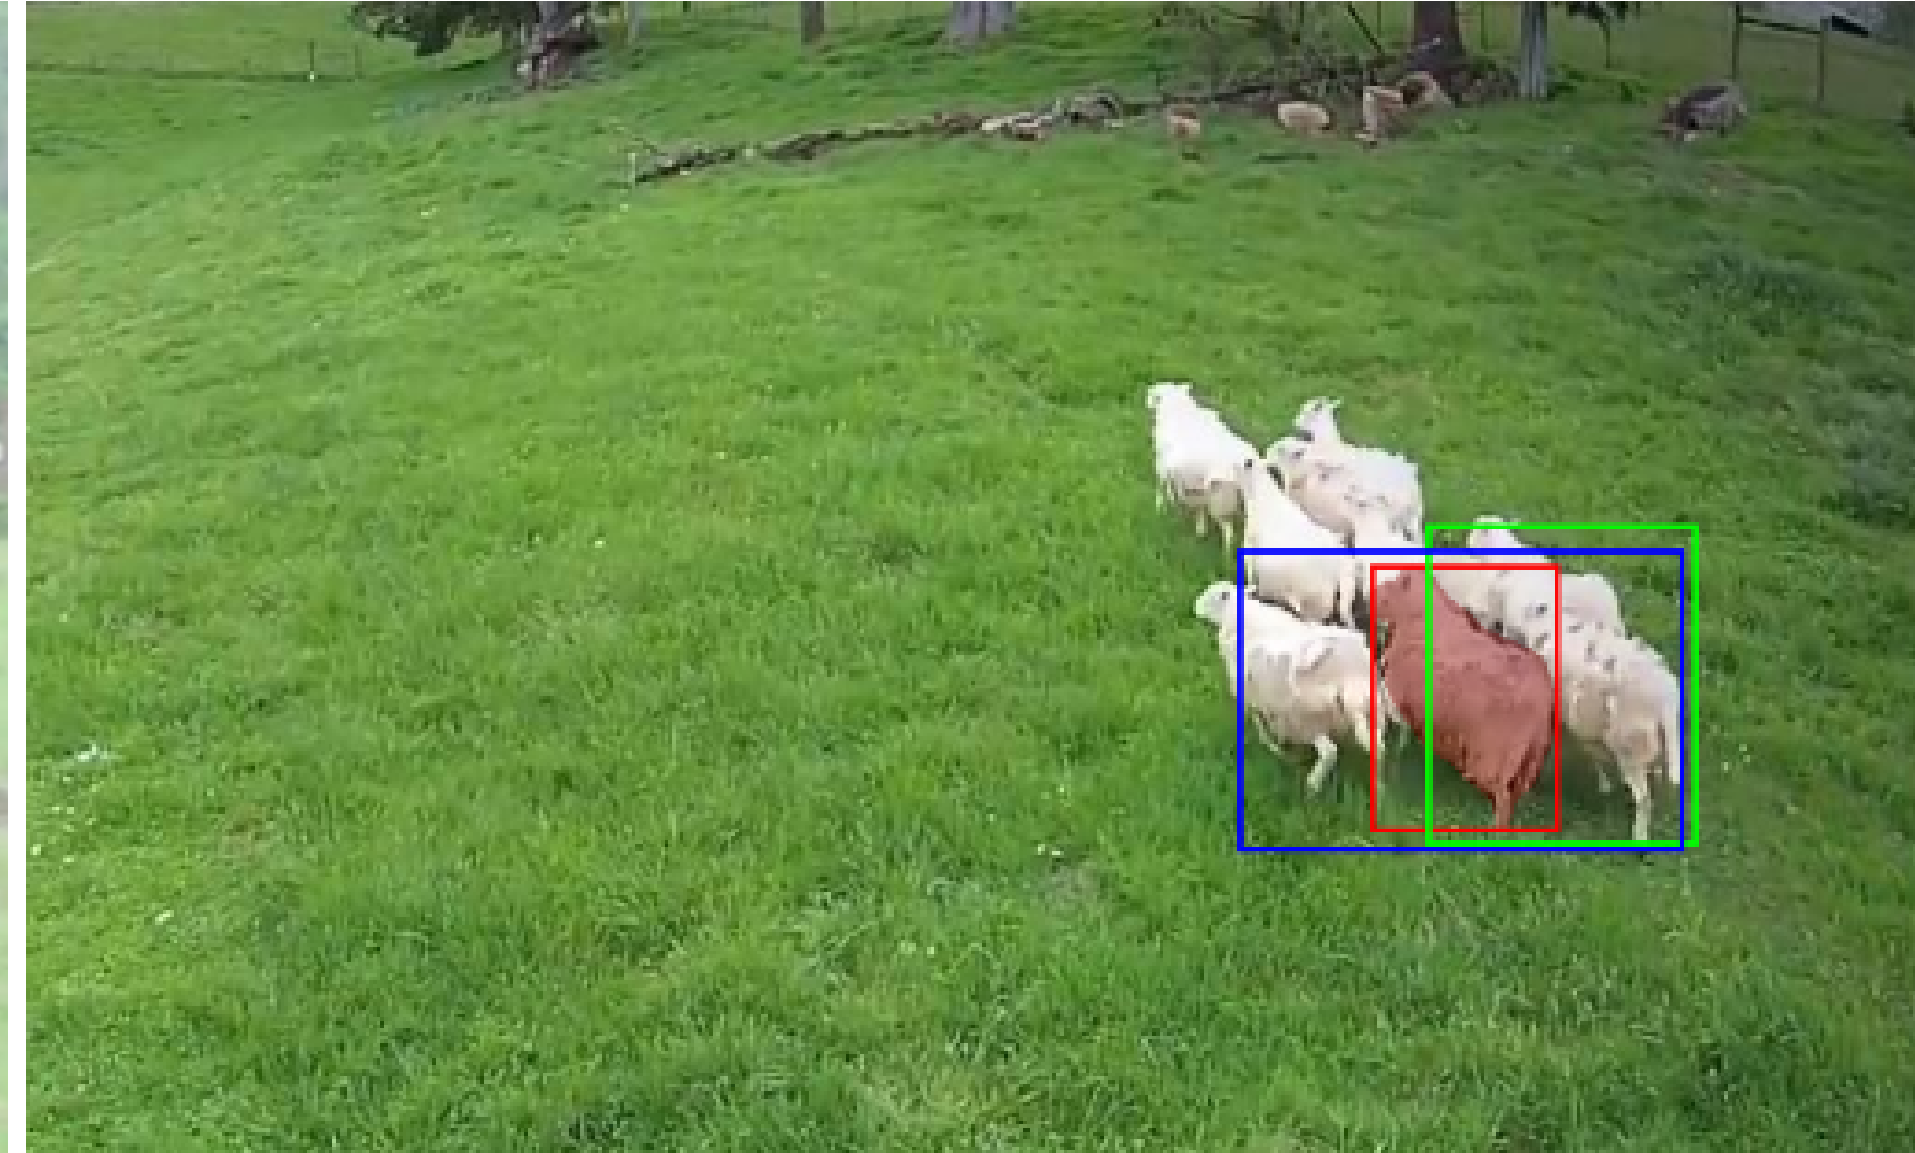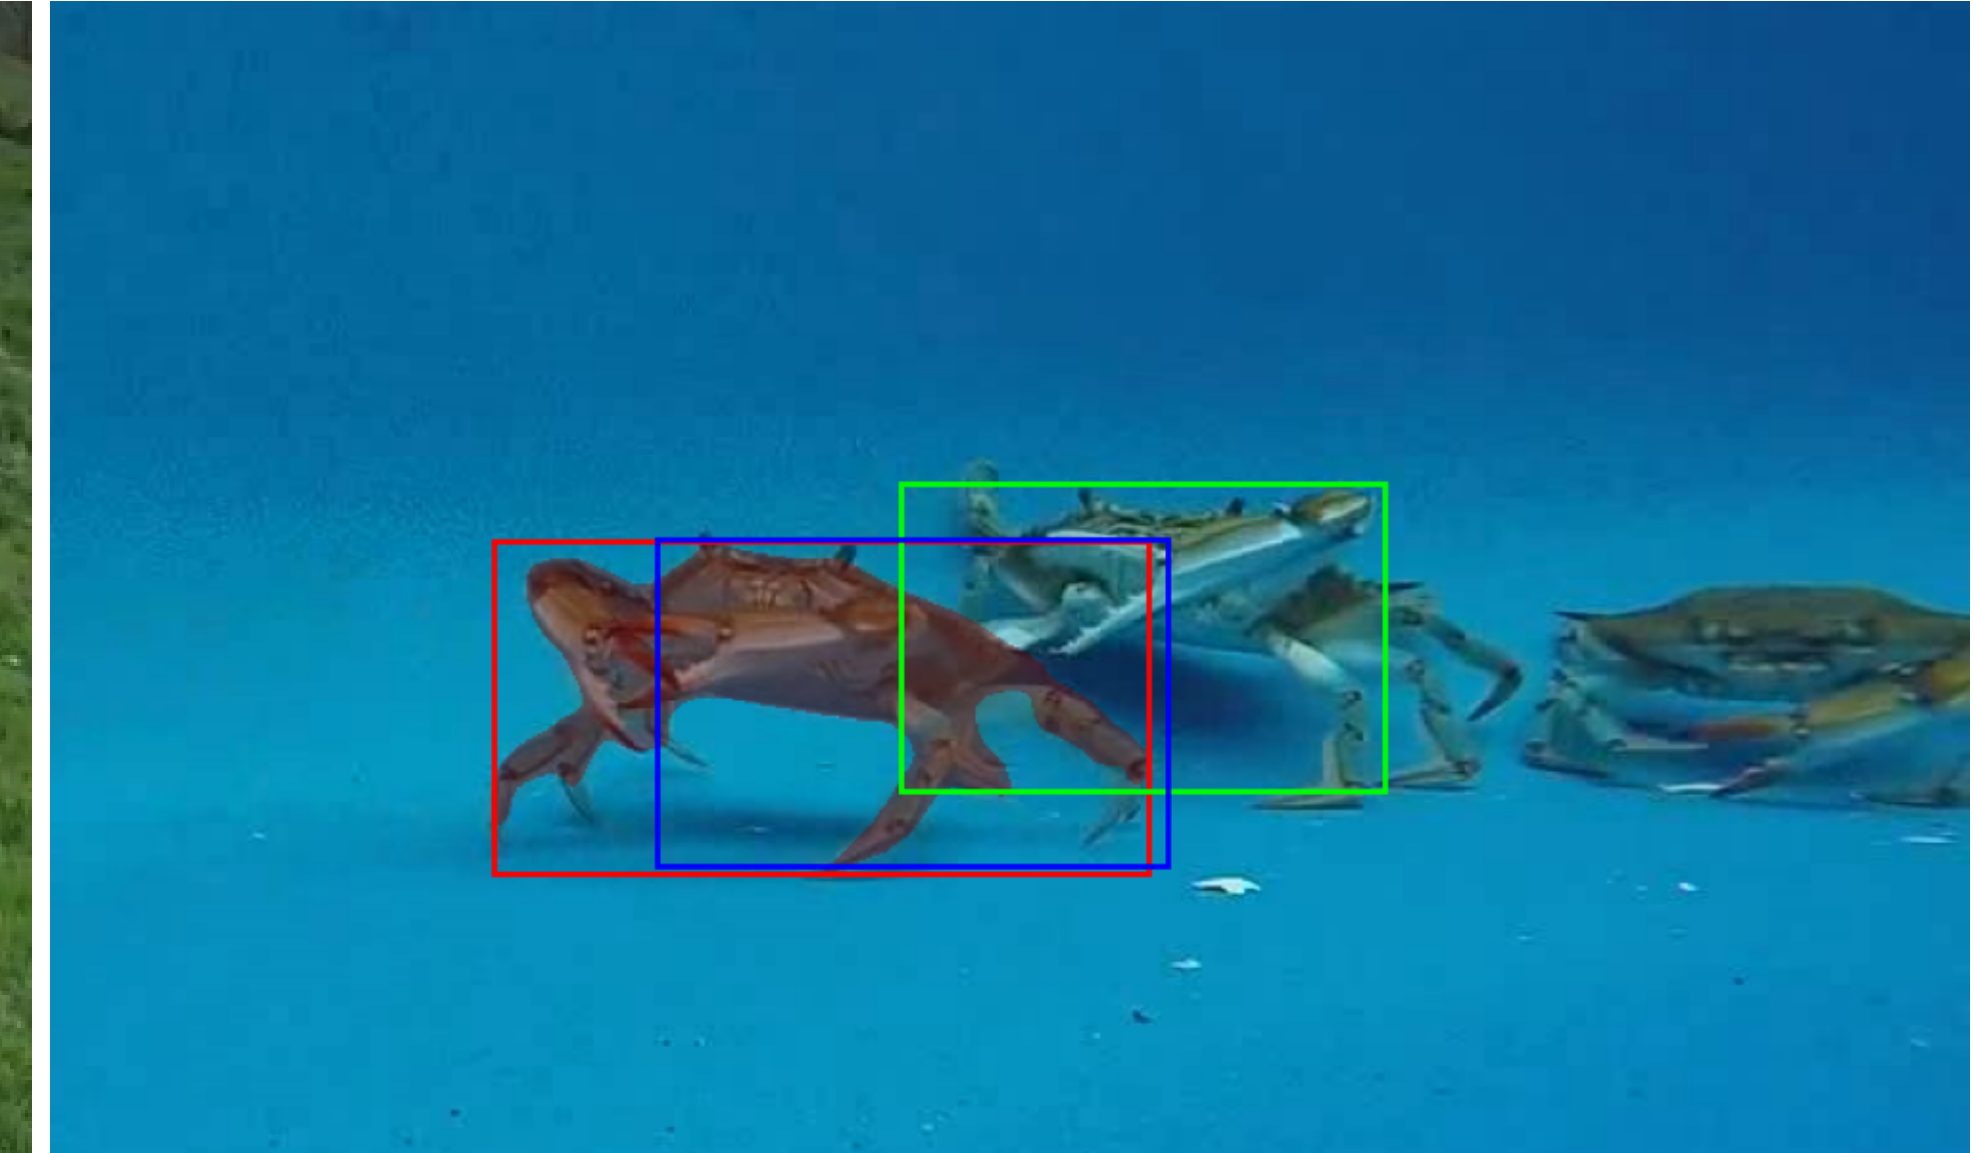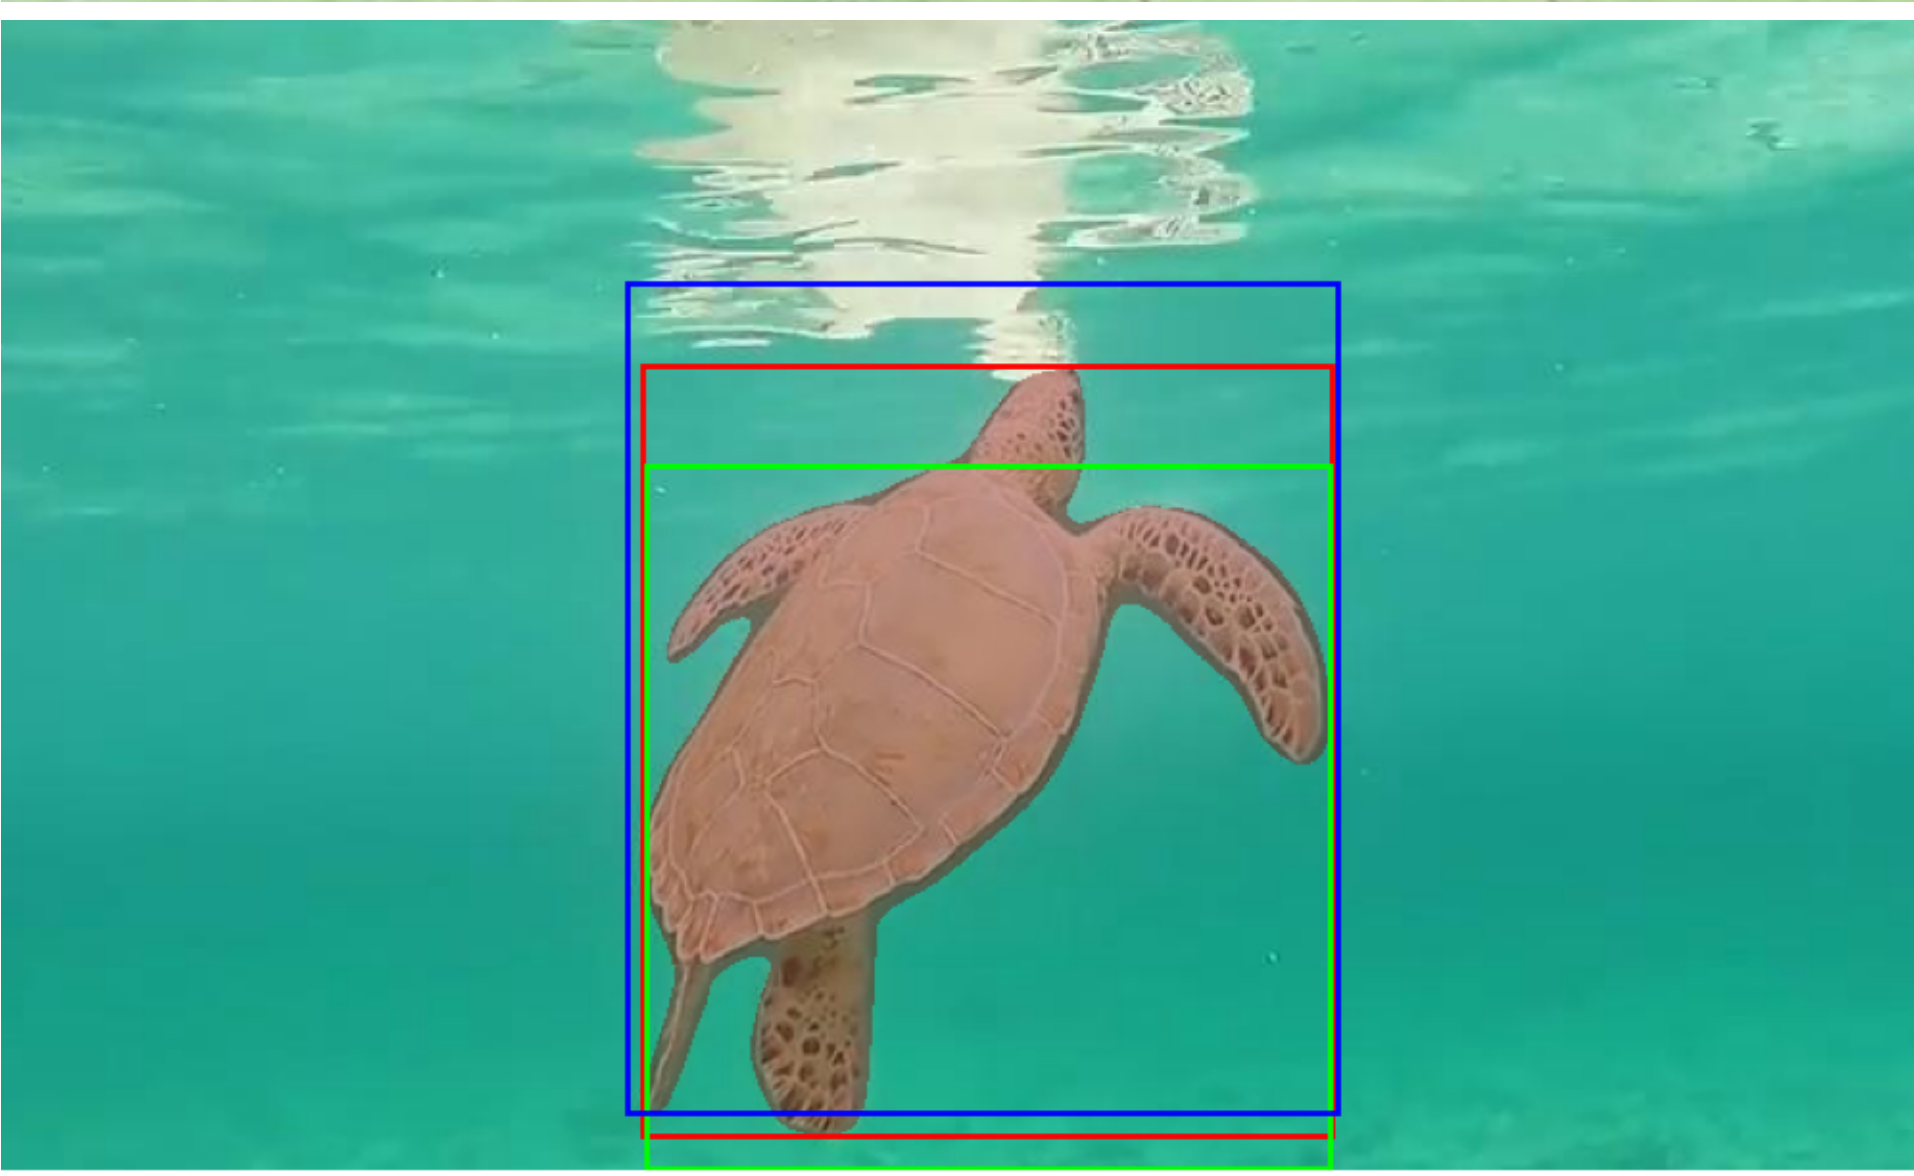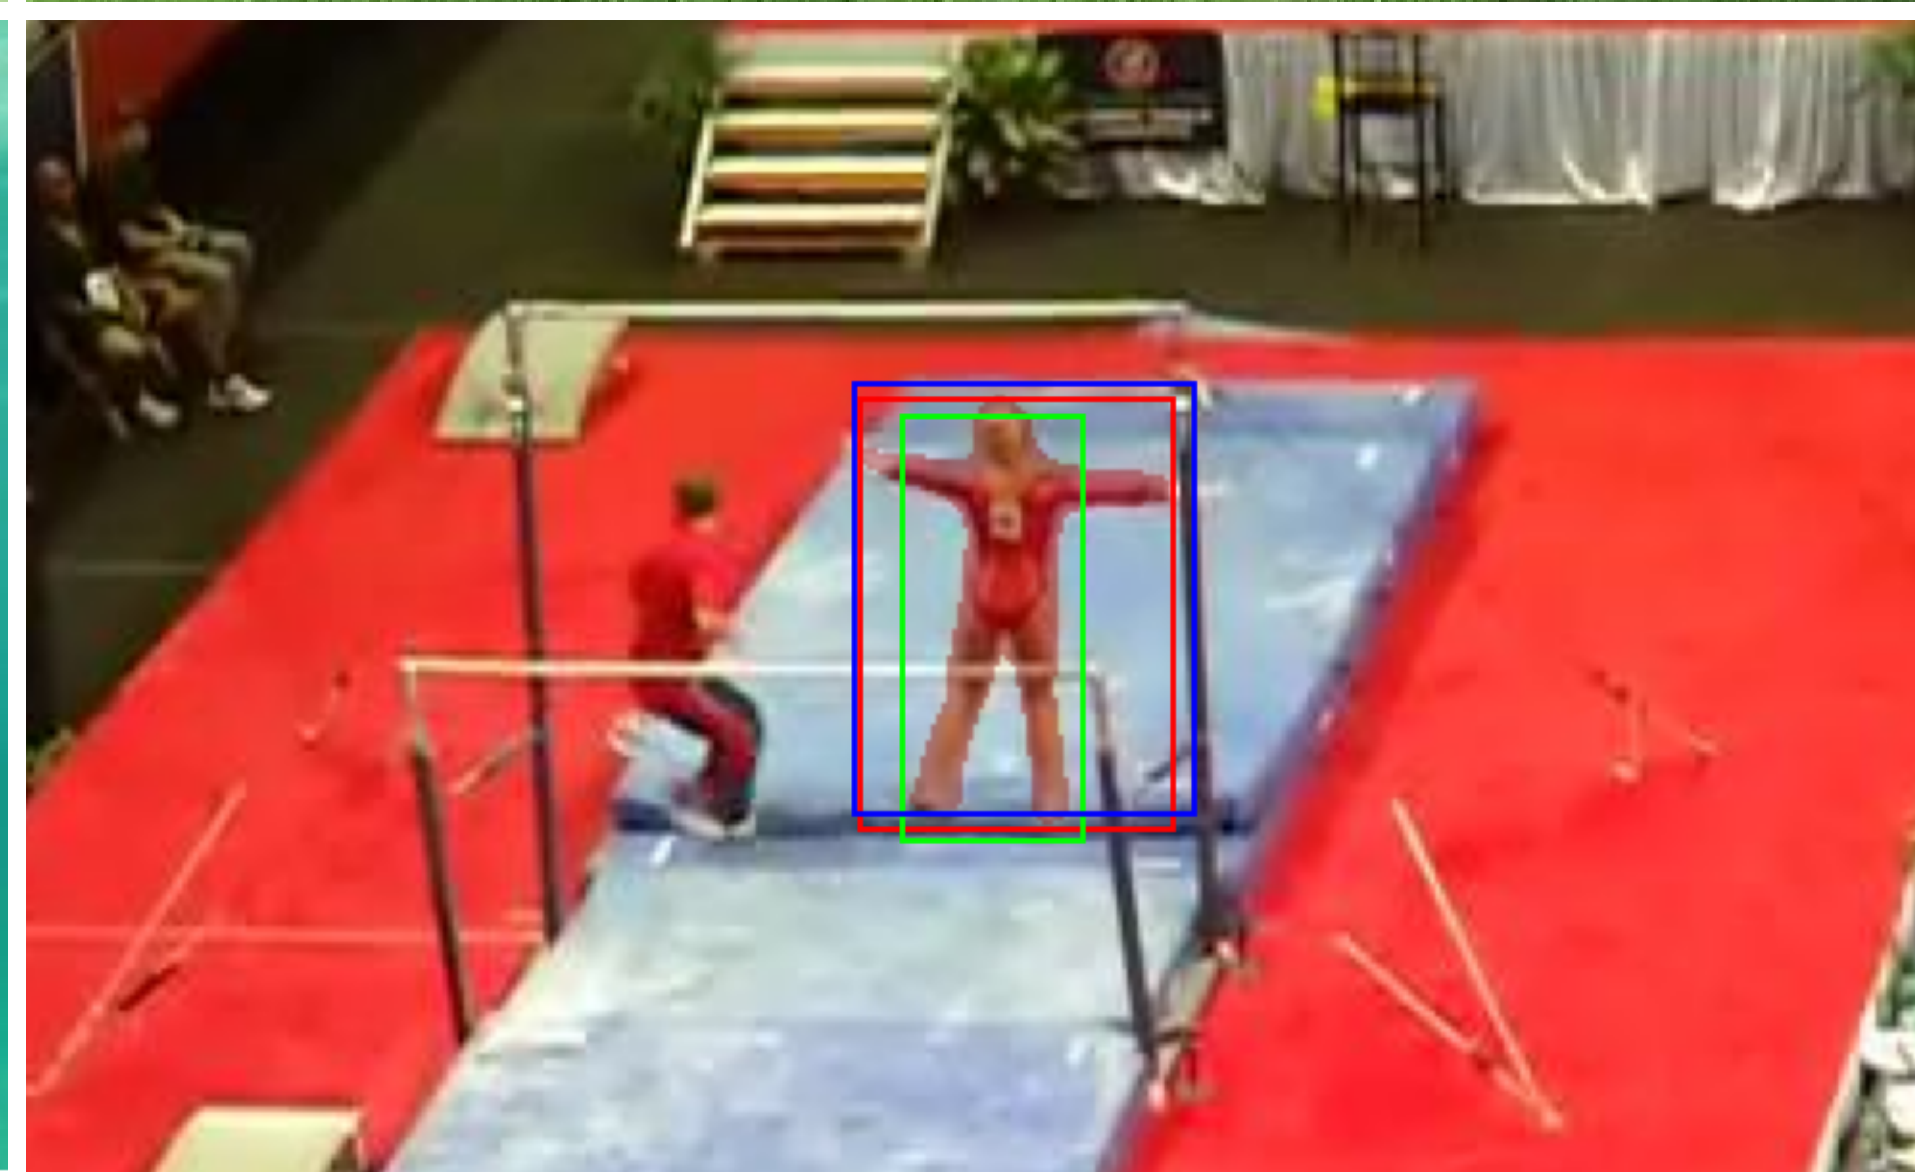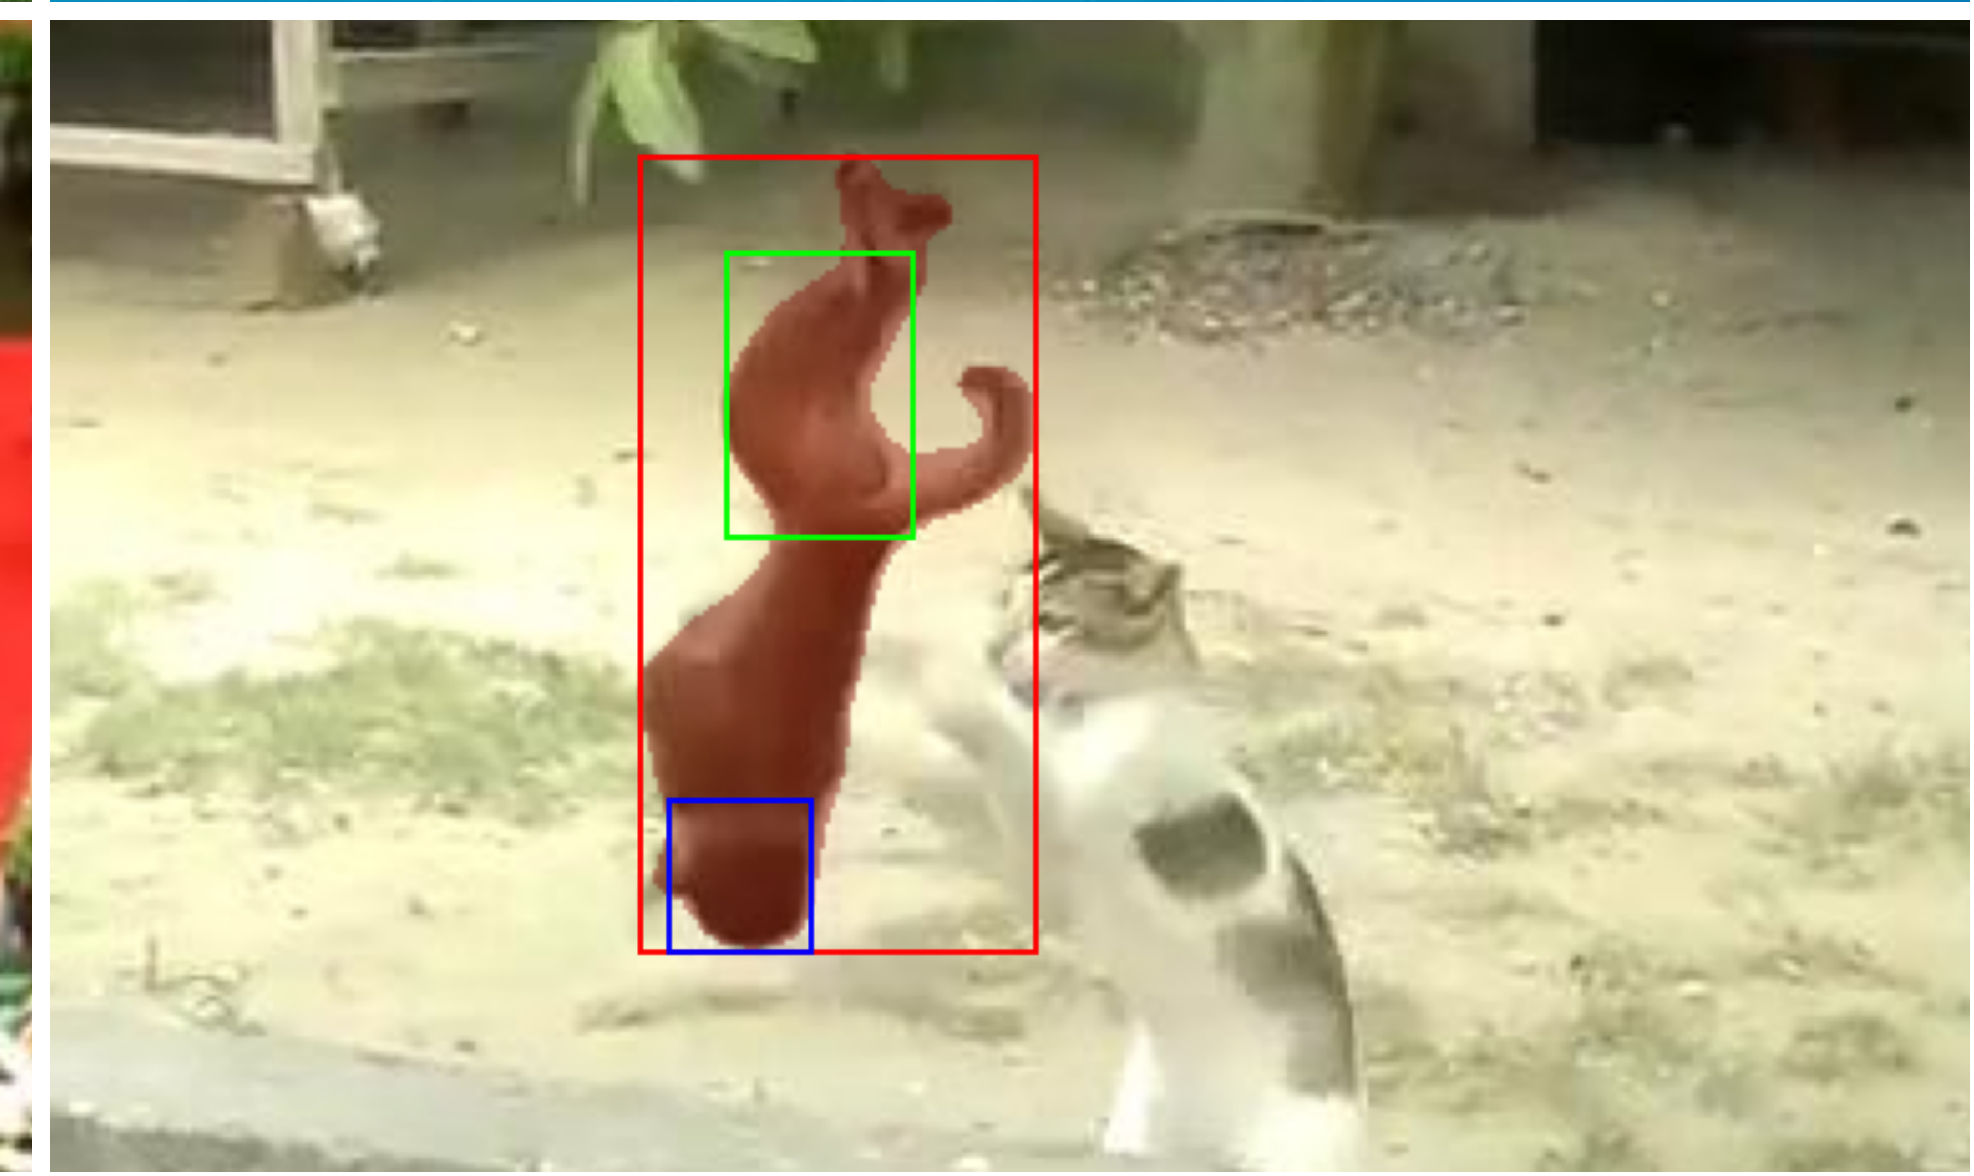

Supplement: Supplementary file 9 [file 136820555-supp.zip]
